# Supplementary material for: Large-scale flood risk analysis of distributed stormwater infrastructure serving 2300 catchments in New York State
Source: Research Square preprint supplement (doi:10.21203/rs.3.rs-7992198/v1), 2025-12-09
Supplement: Supplementary file 1 [file fb2661df70c394d34e29e7d0.pdf]

**Supplementary Information** for Large-scale  
flood risk analysis of distributed Storm-water  
infrastructure serving 2 300 catchments in New York  
State

Omid Emamjomehzadeh<sup>1\*</sup> and Omar Wani<sup>1\*</sup>

<sup>1\*</sup>Tandon School of Engineering, New York University, 6 Metro-tech  
Center, Brooklyn, New York, 11201, United States.

\*Corresponding author(s). E-mail(s): [omid.emamjomehzadeh@nyu.edu](mailto:omid.emamjomehzadeh@nyu.edu);  
[omarwani@nyu.edu](mailto:omarwani@nyu.edu);

001  
002  
003  
004  
005  
006  
007  
008  
009  
010  
011  
012  
013  
014  
015  
016  
017  
018  
019  
020  
021  
022  
023  
024  
025  
026  
027  
028  
029  
030  
031  
032  
033  
034  
035  
036  
037  
038  
039  
040  
041  
042  
043  
044  
045  
046

# 1 Terabytes of geospatial datasets

Table 1 summarizes the geospatial datasets employed in the analysis, including their names, references, and specific use case.

**Table 1:** Geospatial datasets used in this study and their usage

| Name                                                           | Reference | Usage                                                                                                                                                              |
|----------------------------------------------------------------|-----------|--------------------------------------------------------------------------------------------------------------------------------------------------------------------|
| Culvert inventory                                              | [1]       | Used to obtain culvert identification number, latitude, longitude, region, year built, number of spans, maximum span length, road type, design type, and material. |
| 1-m digital elevation model (DEM)                              | [2]       | Used for culverts' watershed delineation and morphological feature extraction (coverage shown in Fig. 1).                                                          |
| 10-m DEM                                                       | [3]       | Used for culverts' watershed delineation and morphological feature extraction where a 1-m DEM coverage, shown in Fig. 1, is unavailable.                           |
| Hydrologic unit code 12 (HUC 12)                               | [4]       | Parallelization units for delineation and morphological-feature extraction algorithms.                                                                             |
| Streets                                                        | [5]       | Used to find road–stream crossings, and burn the DEM at those locations for a realistic stream network generation.                                                 |
| Railroads                                                      | [6]       | Used to find railroads–stream crossings, and burn the DEM at those locations for a realistic stream network generation.                                            |
| Streams                                                        | [7]       | Used to find (rail)road–stream crossings, and burn the DEM at those locations for a realistic stream network generation.                                           |
| Historical precipitation intensity duration frequency analysis | [8]       | Used to get business-as-usual extreme precipitation depths for various durations and return periods.                                                               |
| Projected precipitation intensity duration frequency analysis  | [9, 10]   | Used to get projected extreme precipitation depths for various durations and return periods.                                                                       |
| Historical land cover                                          | [11]      | Used to generate current curve number maps.                                                                                                                        |
| Projected land cover                                           | [12]      | Used to generate projected curve number maps.                                                                                                                      |
| Hydrologic soil group                                          | [13]      | Used to generate curve number maps.                                                                                                                                |
| Curve number map                                               | [14]      | Used to compare the curve number maps with another product.                                                                                                        |
| USGS discharge gages: drainage area and time series            | [15]      | Used for the evaluation of the watershed delineation algorithm and peak-discharge algorithms' accuracy.                                                            |

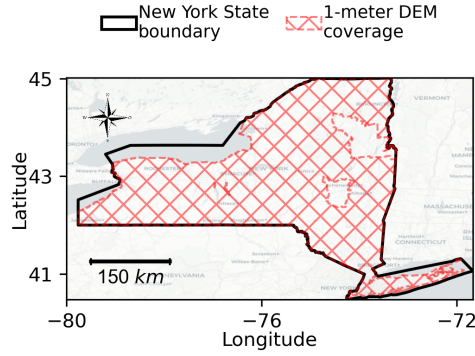

**Fig. 1:** Coverage of the 1-meter digital elevation model provided by *OpenTopography* in New York State.

## 2 Selecting USGS culvert-like stations for drainage area and peak runoff validation

To assess the accuracy of our watershed-delineation algorithm, we identified United States Geological Survey (USGS) streamflow-gaging stations in New York State with small drainage areas less than  $2 \text{ mi}^2$ , comparable to those of culverts. From this set, we selected stations within 20 m of a mapped stream and a road to approximate culvert-like settings, where small drainage areas coincide with road–stream intersections. The USGS and our scalable algorithm independently delineated watershed areas for the selected stations, and the two delineations were compared (Fig. 1, panel **b** of the main manuscript).

Long-term discharge records from culverts would be ideal to validate the hydrologic model’s peak discharges, but such data are unavailable. As a proxy, we selected USGS streamflow-gaging stations in New York State with drainage areas less than  $2 \text{ mi}^2$  and record lengths of more than 15 years. The latter criterion ensures that empirical estimates of the 2- and 5-year discharges—computed following the procedure in Appendix A of the main manuscript—have sufficiently narrow uncertainty for

139 model validation. Five stations met these criteria (site numbers 01362342, 01422389,  
140 04253294, 04253296, and 04253295) and were used as validation sites.  
141

142

143

### 144 **3 Selection process of confident batch of culverts**

145

146 Several factors influence delineation accuracy and can introduce systematic bias into  
147 culverts' exceedance probabilities. We categorized the 8062 culverts by delineation  
148 accuracy (Fig. 2). For benchmarking, delineations were also produced with the USGS  
149 *StreamStats* batch processing tool [16], which successfully delineated 6351 culverts,  
150 compared with 6465 delineated by our method. Culverts that our algorithm could  
151 not delineate were labeled “not analyzed,” owing either to unsuccessful acquisition of  
152 high-resolution digital elevation models or to failure of rationality checks applied to  
153 watershed characteristics.  
154

155 Among culverts delineated by both methods, 1526 exhibited a normalized  
156 drainage-area difference more than 25% and were therefore classified as “large dif-  
157 ference with StreamStats.” To improve reliability, we excluded culverts in urbanized  
158 watersheds—defined as having more than 25% developed land cover in the National  
159 Land Cover Database (classes “developed–open space,” “developed–low intensity,”  
160 “developed–medium intensity,” and “developed–high intensity”)—because subsurface  
161 drainage not represented in our framework could bias results. This criterion eliminated  
162 2096 culverts (“urbanized”). We also removed 425 culverts with delineated drainage  
163 areas bigger than 10 km<sup>2</sup>, as many had snapped to disproportionately large nearby  
164 streams (“too big”). After these filters, 2418 culverts remained in the high-confidence  
165 set for subsequent analyses (“confident batch”).  
166

167

168

169

170

171

172

173

174

175

176

177

178

179

180

181

182

183

184

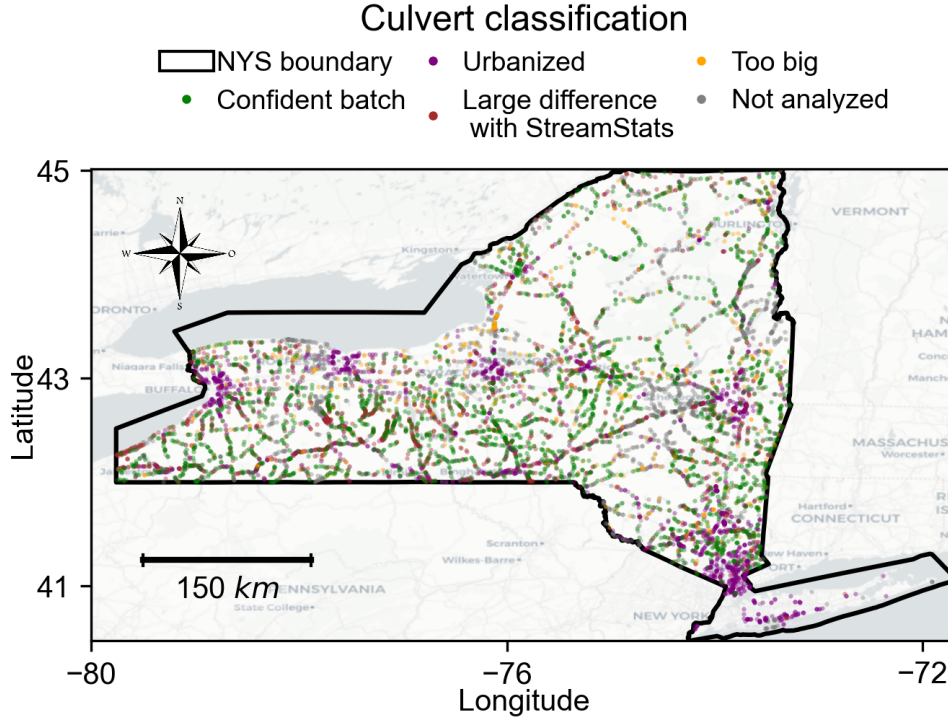

**Fig. 2:** Culverts and their color-dotted delineation accuracy category.

## 4 Maximum and allowable headwater

In the hydraulic-capacity calculation (Equation 4 in the main manuscript), the headwater,  $HW$ , is taken as either the maximum physically attainable headwater or the design-allowable headwater. The maximum headwater,  $HW_{max}$ , is defined as  $HW_{max} = D + Depth$ , where  $D$  is the culvert rise and  $Depth$  is the fill thickness of the cover above the culvert crown. This represents the maximum potential headwater that can build up at the culvert inlet. According to the New York State Department of Transportation Highway Design Manual [17], design criteria limit the allowable headwater at the culvert upstream as a function of the culvert rise. Accordingly, the

allowable headwater,  $HW_{\text{Allow}}$ , is computed using (1), with units in feet. The cumulative probability distribution functions of the maximum and allowable headwaters for the studied culverts are shown in Fig. 3.

$$HW_{\text{Allow}} = \begin{cases} \min(1.5 D, HW_{\text{max}}), & 0 < D \leq 4 \\ \min(1.2 D, HW_{\text{max}}), & 4 < D \leq 5 \\ \min(D, HW_{\text{max}}), & 5 < D \end{cases} \quad (1)$$

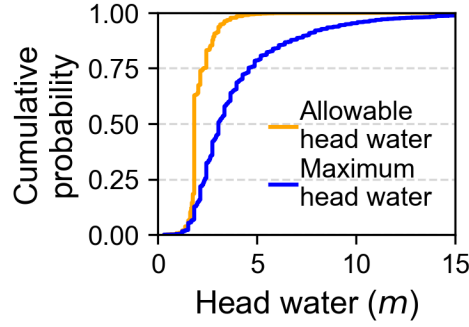

**Fig. 3:** Culverts and their color-dotted delineation accuracy category.

## 5 Uncertainty analysis

Whereas hydraulic analysis provides relatively constrained estimates of hydraulic capacity, the hydrologic model can yield a wider range of discharge values when its sensitive inputs or parameters are varied. In this section, the hydraulic capacity is treated as fixed, and the influence of uncertainties in the hydrologic model on peak discharges is examined. These uncertainties arise primarily from three sources: drainage area, precipitation extremes, and curve number (CN).

The primary source of uncertainty arises from the drainage area, which is affected by inaccuracies in culvert geolocation. To assess this impact, we developed four

watershed delineation scenarios corresponding to maximum location errors of 10, 20, 40, and 80 m. The 10 m and 80 m scenarios represent the lower and upper bounds of the possible drainage areas, respectively. A second source of uncertainty is related to extreme precipitation estimates, with NOAA Atlas 14 providing lower-bound, expected-value, and upper-bound precipitation depths for specific durations and return periods, reflecting uncertainty in extreme precipitation statistics [8]. The third source of uncertainty pertains to the CN parameter. We derived the minimum and maximum CN values from both our analysis and the Google Earth Engine CN product [14], thus establishing a plausible range for this parameter.

We evaluated how input and parameter uncertainties map to peak discharge by constructing bounding estimates. The upper bound used the highest CN, the upper precipitation limit, and the largest watershed area (assuming an 80 m error); the lower bound used the lowest CN, the lower precipitation limit, and the smallest watershed area (assuming a 10 m error). Together, these bounds define an uncertainty envelope within which the peak discharge for each return period is expected to lie.

## 6 Discharge scaling by region

According to the New York State Department of Transportation Highway Design Manual, Albany, Bronx, Broome, Chenango, Columbia, Delaware, Dutchess, Essex, Franklin, Fulton, Greene, Hamilton, Herkimer, Kings, Madison, Montgomery, Nassau, New York, Oneida, Orange, Otsego, Putnam, Queens, Rensselaer, Richmond, Rockland, Saratoga, Schenectady, Schoharie, St. Lawrence, Suffolk, Sullivan, Ulster, Warren, Washington, and Westchester counties, the design discharge should be increased by 20%. Additionally, Allegany, Cattaraugus, Cayuga, Chautauqua, Chemung, Cortland, Erie, Genesee, Livingston, Monroe, Niagara, Ontario, Onondaga, Orleans, Schuyler, Seneca, Steuben, Tioga, Tompkins, Wayne, Wyoming, and Yates counties' design discharge should be increased by 10% [17]. For each return period, discharges

were scaled by the recommended factors, and the results were compared with culvert capacities (Fig. 4, panel **b2**, main manuscript).

## 7 Hydraulic-capacity modeling (coefficient estimation)

The *HY-8* requires detailed information for each culvert—including inlet configuration, wingwall type, and other structural characteristics—to calculate the hydraulic coefficients  $a$ ,  $b$ ,  $c$ ,  $d$ ,  $e$ , and  $f$  following the *HY-8* user manual [18]. Such detailed information is not available in the large culvert dataset; instead, the design type of culverts is available in the dataset. Instead, this study employs three groups of pre-defined coefficients: **A**) circular culverts (design type codes 41 and 42), **B**) oval culverts (design type codes 25 and 26), and **C**) rectangular culverts (applied to all remaining cases where the design type does not fall into groups A or B). For each category (**A**, **B**, and **C**), the corresponding coefficient combinations are extracted from the *HY-8* user manual and summarized in Table 2.

The hydraulic capacity of each culvert is calculated by solving Equation 4 for  $Q_{capacity_n}$ . Since it is a five-order polynomial expression, the root of this function can be found using numerical methods, which require an initial guess. This initial guess was set to  $100 \text{ ft}^3\text{s}^{-1}$ . The procedure iterates over all coefficient combinations associated with the culvert category (Table 2). The mean of the resulting values is taken as the culvert’s expected hydraulic capacity, while the minimum and maximum values across the coefficient combinations define the parametric uncertainty bounds of this approach.



**Table 2:** Coefficients used to model hydraulic capacity for each group of culverts

| Category/coefficient | <i>a</i> | <i>b</i> | <i>c</i>  | <i>d</i> | <i>e</i> | <i>f</i> |
|----------------------|----------|----------|-----------|----------|----------|----------|
| A                    | 0.187321 | 0.56771  | -0.15654  | 0.044705 | -0.00344 | 8.97E-05 |
|                      | 0.107137 | 0.757789 | -0.36146  | 0.123393 | -0.01606 | 0.000767 |
|                      | 0.167433 | 0.538595 | -0.14937  | 0.039154 | -0.00344 | 0.000116 |
|                      | 0.108786 | 0.662381 | -0.2338   | 0.057959 | -0.00558 | 0.000205 |
|                      | 0.114099 | 0.653562 | -0.23362  | 0.059772 | -0.00616 | 0.000243 |
|                      | 0.063343 | 0.766512 | -0.3161   | 0.08767  | -0.00984 | 0.000417 |
|                      | 0.08173  | 0.698353 | -0.25368  | 0.065125 | -0.0072  | 0.000312 |
|                      | 0.167287 | 0.558766 | -0.15981  | 0.042007 | -0.00369 | 0.000125 |
|                      | 0.087483 | 0.706578 | -0.2533   | 0.0667   | -0.00662 | 0.000251 |
|                      | 0.120659 | 0.630768 | -0.21842  | 0.059182 | -0.00599 | 0.000229 |
| B                    | 0.08905  | 0.71255  | -0.27092  | 0.07925  | -0.00798 | 0.00029  |
|                      | 0.12263  | 0.4825   | -2.00E-05 | -0.04287 | 0.01454  | -0.00117 |
|                      | 0.14168  | 0.49323  | -0.03235  | -0.02098 | 0.00989  | -0.00086 |
|                      | 0.09219  | 0.65732  | -0.19423  | 0.04476  | -0.00176 | -0.00012 |
|                      | 0.0833   | 0.79514  | -0.43408  | 0.16377  | -0.02491 | 0.00141  |
|                      | 0.1062   | 0.7037   | -0.3531   | 0.1374   | -0.02076 | 0.00117  |
|                      | 0.23645  | 0.37198  | -0.0401   | 0.03058  | -0.00576 | 0.00045  |
|                      | 0.10212  | 0.72503  | -0.34558  | 0.12454  | -0.01676 | 0.00081  |
|                      | 0.11128  | 0.61058  | -0.19494  | 0.05129  | -0.00481 | 0.00017  |
|                      | 0.12346  | 0.50432  | -0.13261  | 0.0402   | -0.00448 | 0.00021  |
|                      | 0.09728  | 0.57515  | -0.15977  | 0.04223  | -0.00374 | 0.00012  |
|                      | 0.09455  | 0.61669  | -0.22431  | 0.07407  | -0.01002 | 0.00054  |
|                      | 0.16884  | 0.38783  | -0.03679  | 0.01173  | -0.00066 | 2.00E-05 |
|                      | 0.1301   | 0.43477  | -0.07911  | 0.01764  | -0.0011  | 2.00E-05 |
|                      | 0.09618  | 0.52593  | -0.13504  | 0.03394  | -0.00325 | 0.00013  |
| C                    | 0.122117 | 0.505435 | -0.10856  | 0.020781 | -0.00137 | 3.46E-05 |
|                      | 0.106759 | 0.455158 | -0.08129  | 0.012156 | -0.00068 | 1.48E-05 |
|                      | 0.166609 | 0.398935 | -0.06404  | 0.011201 | -0.00064 | 1.46E-05 |
|                      | 0.072493 | 0.507087 | -0.11747  | 0.02217  | -0.00149 | 3.80E-05 |
|                      | 0.144133 | 0.461363 | -0.09215  | 0.020003 | -0.00136 | 3.58E-05 |
|                      | 0.099563 | 0.441247 | -0.07435  | 0.012732 | -0.00076 | 1.77E-05 |

## 8 Automatic pipeline for DEM acquisition and watershed delineation

### 8.1 DEM acquisition

This study utilized a high-resolution 1-m DEM available through the U.S. Geological Survey's 3DEP program [2], accessed via the *OpenTopography* platform. The 1-meter

DEM provides the level of detail necessary for delineating the catchments of culverts, as it accurately represents the impact of roads on the surrounding watershed. However, in areas where the 1-meter DEM was unavailable, the analysis depended on the 10-m resolution DEM [3] to ensure better coverage of New York State.

Downloading and processing a state-wide 1-m resolution DEM is computationally infeasible due to the massive size of the data (on the terabit scale). To address this, the problem must be reformulated to leverage parallel computing. Specifically, the DEM for each HUC 12 can be downloaded separately, and the drainage area delineation for the culverts within each unit can be processed in parallel. Given that the catchment area for a culvert within a given HUC 12 is independent of the rest of the DEM, we can efficiently download the DEM for each HUC 12, perform watershed delineation, and extract the morphological features of the culverts within that unit independently.

The OpenTopography Application Programming Interface (API) is used to download 1-m DEM data for each HUC12 automatically; however, it imposes certain restrictions on access. Specifically, users are limited to a 300 number of queries every 24 hours, and each DEM download request is restricted to a maximum bounding box area of 250 km<sup>2</sup> for 1-meter resolution data. These limitations necessitate strategic planning when downloading large-scale DEM data to ensure compliance with *OpenTopography*'s access policies. When an HUC12 exceeded the bounding box limit, the script subdivided it into smaller sections (with 10% overlap) to comply with the platform's constraints. After downloading, the DEM tiles for each HUC12 were merged using *gdal.BuildVRT* [19] command and was then transformed to a GeoTIFF to form a complete elevation model for the HUC12. This iterative and modular approach ensured compliance with download restrictions and facilitated large-scale processing and management of several terabyte-scale elevation data required for the study.

## 8.2 Watershed delineation

For each HUC12 unit, the watershed delineation algorithm delineates culvert watersheds and extracts key morphological features required as inputs for the hydrologic model, including the watershed drainage area, longest flow path, and average catchment slope.

A key challenge addressed in the algorithm is the inaccuracy of culvert location data; recorded coordinates may be offset by several tens of meters. Even when locations are approximately correct, they are frequently mapped directly on roads. This introduces complications for watershed delineation, as roads act as artificial barriers to surface flow, causing points located on roads to generate unrealistically small catchments. Furthermore, digital elevation models do not represent underground drainage systems such as large culverts, making it difficult to correctly model stream networks passing through them. As a result, streams may appear to terminate at roads rather than pass through them, leading to fragmented or unrealistic stream networks and inaccurate catchment delineations.

To address these challenges, the workflow for each HUC12 begins by loading spatial datasets—streams, culverts, roads, and HUC12 boundaries—using *GeoPandas* [20]. A dedicated working directory is created for each HUC12, and the DEMs are preprocessed with *WhiteboxTools* [21]. Preprocessing includes filling depressions with the *wbt.fill\_depressions* command and burning road–stream intersections into the DEM using *wbt.burn\_streams\_at\_roads*. Afterwards, flow direction and flow accumulation rasters are generated with the *wbt.d8\_pointer* and *wbt.d8\_flow\_accumulation* commands.

To address inaccuracies in the location of culverts, the script snaps the culvert point to the nearest highest-flow accumulated cell within predefined distances of 10, 20, 40, and 80 m of the original location using *wbt.snap\_pour\_points*. The code then delineates catchments using the *wbt.watershed* command, calculates the longest

507 flow path using the *wbt.longest\_flowpath* command, and finally calculates the average  
508 watershed slope using the *wbt.slope* command. Finally, all information is compiled into  
509 a structured data frame and saved as both an Excel file and a shape file for each HUC  
510  
511 12. This automated approach streamlines the complex task of watershed delineation  
512 and provides the morphologic features required for the hydrologic model.  
513

514  
515     Regarding the computation time, culverts' watershed delineation at the state-wide  
516 scale is a computationally intensive and complex task using a 1-m DEM. For exam-  
517 ple, in HUC12 '050100020104,' which contains seven culverts, delineating watersheds  
518 under four error scenarios of 10, 20, 40, and 80 m, requires approximately 1215 sec-  
519 onds (about 20 minutes) using MSC v.1940 (64-bit, AMD64) on a Windows 11 system  
520 equipped with an Intel64 Family 6 Model 183 Stepping 1 processor (GenuineIntel)  
521 with 24 CPU cores. Extrapolated to all culverts, sequential processing would require  
522 more than 16 days. By batching computations into 5 groups and running them in  
523 parallel, the total time is reduced to 6 days. The choice of 5 batching groups reflects  
524 available computational resources; increasing the number of groups (e.g., to match the  
525 number of HUC12s, which is more than 1000) would further reduce computational  
526 time.  
527  
528  
529  
530  
531  
532  
533  
534  
535  
536

## 537 References

- 538  
539 [1] New York State Department of Transportation. NYSDOT Large Culverts  
540 Dataset. [https://data.gis.ny.gov/datasets/9e038774ef034c7cae5374f3e23f7a67\\_1/about](https://data.gis.ny.gov/datasets/9e038774ef034c7cae5374f3e23f7a67_1/about)  
541 (2023). URL [https://data.gis.ny.gov/datasets/](https://data.gis.ny.gov/datasets/9e038774ef034c7cae5374f3e23f7a67_1/about)  
542 [9e038774ef034c7cae5374f3e23f7a67\\_1/about](https://data.gis.ny.gov/datasets/9e038774ef034c7cae5374f3e23f7a67_1/about).  
543  
544  
545  
546 [2] U.S. Geological Survey. 3D Elevation Program (3DEP) - 1-Meter Digital  
547 Elevation Models (DEMs). <https://opentopography.org/> (2021). URL <https://opentopography.org/>.  
548  
549  
550  
551  
552

- [3] United States Geological Survey. United States Geological Survey 3D Elevation Program 1/3 arc-second Digital Elevation Model. <https://doi.org/10.5069/G98K778D> (2021). URL <https://doi.org/10.5069/G98K778D>. 553  
554  
555  
556  
557  
558  
559
- [4] New York State Department of State. Watershed Boundary Dataset (HUC 12) for New York State. <https://opdgig.dos.ny.gov/datasets/NYSDOS::watershed-boundary-huc-12/about> (2022). URL <https://opdgig.dos.ny.gov/datasets/NYSDOS::watershed-boundary-huc-12/about>. 560  
561  
562  
563  
564  
565  
566  
567
- [5] New York State Office of Information Technology Services. NYS Streets - Vector Street Layer for New York State. <https://gis.ny.gov/streets-addresses> (2023). URL <https://data.gis.ny.gov/maps/7d5dff6bcf664e6f83abee9968fc7916/about>. 568  
569  
570  
571  
572  
573
- [6] New York State Department of State. Railroad Dataset – Paths and Locations of Active and Abandoned Railroad Lines in New York State. <https://opdgig.dos.ny.gov/datasets/NYSDOS::railroad/about> (2022). URL <https://opdgig.dos.ny.gov/datasets/NYSDOS::railroad/about>. 574  
575  
576  
577  
578  
579  
580
- [7] New York State Information Technology Services Geospatial Services. NYS Hydrography. [https://gisservices.its.ny.gov/arcgis/rest/services/NYS\\_Hydrography/MapServer](https://gisservices.its.ny.gov/arcgis/rest/services/NYS_Hydrography/MapServer) (2023). URL <https://data.gis.ny.gov/maps/sharegisny::nys-hydrography/about?path=>. 581  
582  
583  
584  
585  
586  
587  
588  
589
- [8] Perica, S. *et al.* NOAA Atlas 14: Precipitation-Frequency Atlas of the United States, Volume 10, Version 3.0: Northeastern States. Tech. Rep. NOAA Atlas 14 Volume 10, U.S. Department of Commerce, National Oceanic and Atmospheric Administration, National Weather Service, Silver Spring, Maryland (2015). URL [https://www.weather.gov/media/owp/oh/hdsc/docs/Atlas14\\_Volume10.pdf](https://www.weather.gov/media/owp/oh/hdsc/docs/Atlas14_Volume10.pdf). 590  
591  
592  
593  
594  
595  
596  
597  
598

599 [9] DeGaetano, A. T. & Castellano, C. M. Future projections of extreme precipita-  
600 tion intensity-duration-frequency curves for climate adaptation planning in New  
601 York State. *Climate Services* **5**, 23–35 (2017). URL [https://www.sciencedirect.](https://www.sciencedirect.com/science/article/pii/S2405880716300516)  
602 [com/science/article/pii/S2405880716300516](https://www.sciencedirect.com/science/article/pii/S2405880716300516).  
603  
604  
605  
606 [10] DeGaetano, A. T. & Castellano, C. M. Downscaled Projections of Extreme  
607 Rainfall in New York State Technical Document. Tech. Rep.  
608  
609  
610 [11] Dewitz, J. National Land Cover Database (NLCD) 2021 Products (2023). URL  
611 <https://doi.org/10.5066/P9JZ7AO3>.  
612  
613  
614 [12] Sohl, T. L. *et al.* Conterminous United States Land Cover Projections - 1992 to  
615 2100 (2018). URL <https://doi.org/10.5066/P95AK9HP>.  
616  
617  
618 [13] Esri. Hydrologic Soil Class Dataset. [https://services1.arcgis.com/6jEyBm2OMIBxuM1E/arcgis/rest/ser](https://services1.arcgis.com/6jEyBm2OMIBxuM1E/arcgis/rest/services/Hydrologic_Soil_Class_Public/FeatureServer)  
619 (2022). URL [https://services1.arcgis.com/6jEyBm2OMIBxuM1E/arcgis/rest/](https://services1.arcgis.com/6jEyBm2OMIBxuM1E/arcgis/rest/services/Hydrologic_Soil_Class_Public/FeatureServer)  
620 [services/Hydrologic\\_Soil\\_Class\\_Public/FeatureServer](https://services1.arcgis.com/6jEyBm2OMIBxuM1E/arcgis/rest/services/Hydrologic_Soil_Class_Public/FeatureServer).  
621  
622  
623  
624 [14] Jaafar, H. H., Ahmad, F. A. & El Beyrouthy, N. GCN250, new global gridded  
625 curve numbers for hydrologic modeling and design. *Scientific Data* **6**, 145 (2019).  
626  
627  
628  
629  
630  
631 [15] Hodson, T. O., Hariharan, J. A., Black, S. & Horsburgh, J. S. dataretrieval  
632 (Python): A Python package for discovering and retrieving water data available  
633 from U.S. federal hydrologic web services. USGS software release (2023). URL  
634 <https://doi.org/10.5066/P94I5TX3>.  
635  
636  
637  
638 [16] U.S. Geological Survey. StreamStats (2019).  
639  
640  
641 [17] NYSDOT. HIGHWAY DESIGN MANUAL, Chapter 8. Tech. Rep. (2021). URL  
642 <https://www.dot.ny.gov/divisions/engineering/design/dqab/hdm/chapter-8>.  
643  
644

[18] Christopher Smemoe. HY-8 User Manual (v7.5) HY-8 Culvert Analysis Program (2016). URL [http://wmsdocs.aquaveo.com/HY-8\\_UserManual\\_v7.5.pdf](http://wmsdocs.aquaveo.com/HY-8_UserManual_v7.5.pdf).

[19] GDAL/OGR contributors. GDAL/OGR Geospatial Data Abstraction software Library (2025). URL <https://gdal.org>.

[20] Jordahl, K. *et al.* geopandas/geopandas: v0.8.1 (2020). URL <https://doi.org/10.5281/zenodo.3946761>.

[21] Lindsay, J. B. *The Whitebox Geospatial Analysis Tools project and open-access GIS*, 16–18 April (The University of Glasgow, 2014). URL <https://doi.org/10.13140/RG.2.1.1010.8962>.
